# Supplementary material
Source: Springer Nature journal article supplement (https://www.springermedizin.de/resource/supplementary/12943_2010_773_MOESM11_ESM.pdf/9554784)
Supplement: MOESM11 [file 9554784]

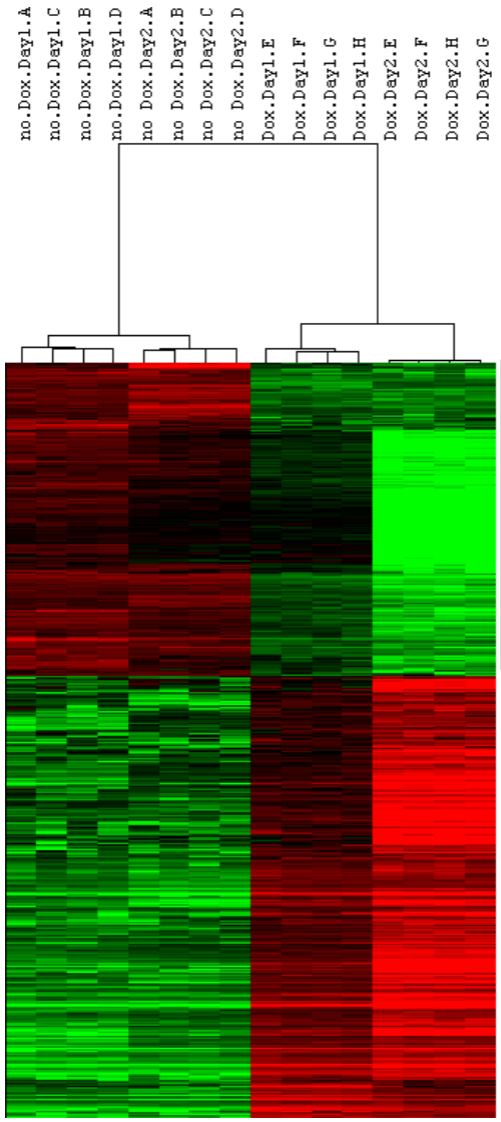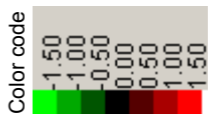

no.Dox.Day1.A  
 no.Dox.Day1.C  
 no.Dox.Day1.B  
 no.Dox.Day1.D  
 no Dox.Day2.A  
 no Dox.Day2.B  
 no Dox.Day2.C  
 no Dox.Day2.D  
 Dox.Day1.E  
 Dox.Day1.F  
 Dox.Day1.G  
 Dox.Day1.H  
 Dox.Day2.E  
 Dox.Day2.F  
 Dox.Day2.H  
 Dox.Day2.G

532 genes induced  $\geq 2$ -fold  
 $p \leq 0.008$

378 genes repressed  $\geq 2$ -fold  
 $p \leq 0.008$
